# Supplementary material for: Dbf4-dependent kinase promotes cell cycle controlled resection of DNA double-strand breaks and repair by homologous recombination
Source: PubMed Central journal article supplement (PMC10991553; doi:10.1038/s41467-024-46951-z), 2024-04-03
Supplement: 41467_2024_46951_MOESM3_ESM.pdf [file 41467_2024_46951_MOESM3_ESM.pdf]

## Description of Additional Supplementary Files

File Name: Supplementary Data 1

Description: Gene ontology (GO) analysis of biological processes (BP) for proteins part of the DDK-cluster of Figure 1d. The list of gene names from Perseus was used as an input and the analysis was performed with <https://geneontology.org> using default settings as reported in the excel file (for  $p$  values a Fisher's exact test with FDR correction was selected).

File Name: Supplementary Data 2

Description: List of the yeast strains used in this study.

File Name: Supplementary Data 3

Description: List of the primers used for qPCR-based experiments in this study.
